1 **Application of chaos and systems theories to explore health workforce re-organisation**  
2 **following district splitting in Uganda**

3 **Authors:** Aloysius Mutebi<sup>1</sup>, Moses Mukuru<sup>2</sup>, Suzanne Kiwanuka<sup>1</sup>, Fredrick Makumbi<sup>1</sup>, Elizeus  
4 Rutebemberwa<sup>1</sup>

5 **Email addresses of co-authors**

6 Moses Mukuru: [mukurumose@gmail.com](mailto:mukurumose@gmail.com)

7 Suzanne Kiwanuka: [skiwanuka@musph.ac.ug](mailto:skiwanuka@musph.ac.ug)

8 Fredrick Makumbi: [fmakumbi@musph.ac.ug](mailto:fmakumbi@musph.ac.ug)

9 Elizeus Rutebemberwa: [ellie@musph.ac.ug](mailto:ellie@musph.ac.ug)

10 **Affiliations**

11 <sup>1</sup>Makerere University School of Public Health, Kampala, Uganda

12 <sup>2</sup>Nottingham Trent University

13 \* **Corresponding author' email address:** [amutebi@musph.ac.ug](mailto:amutebi@musph.ac.ug)

14 **Running Title:** Application of chaos and systems theories in health workforce re-organisation

15

16 **Abstract**

17 **Background**

18 District splitting (DS) began in 1962 and intensified in 1997 during implementation of  
19 decentralization. This legislative process focuses on geographical demarcation. The health  
20 system, organized along local government structures, was re-organized as a result of DS.  
21 However, this study explored how the health workforce, as a component of the local government  
22 health system, re-organized following district splitting.

23 **Methods**

24 Conducted between June and December 2018, the qualitative study involved 22 key informant  
25 interviews in eight districts, representing four broader regions (North, Western, Eastern and  
26 Central) of Uganda. Participants included district political leaders, local government staff, district  
27 service commission members, district health team officials, and district senior management. Data  
28 was collected using an interview guide and four themes were identified for deductive thematic  
29 analysis.

30 **Results**

31 Findings reveal that district splitting led to an involuntary division of the health system between  
32 old and new districts, triggering multidirectional reorganization of the health workforce. Health  
33 workers were systematically allocated to districts based on the geographical location of their  
34 health facilities during the splitting process. Subsequently, inter-district migration occurred  
35 through health workforce secondment or appointment, while intra-health system migration  
36 involved vertical movement of health workers within districts during recruitment. This  
37 reorganization resulted in workforce shortages in health facilities vacated by migrating health  
38 workers.

39 **Conclusions** NOTE: This preprint reports new research that has not been certified by peer review and should not be used to guide clinical practice.

40 The study concludes that district splitting caused unintended consequences as a result of chaotic  
41 occurrences that led to reorganization of the health workforce in both new and old districts, and  
42 caused gaps in service delivery capabilities. Adopting a systems and chaos perspective, the study  
43 emphasizes the importance of considering frontline service delivery systems as subsystems of  
44 the overall district system when evaluating the impact of district splitting. Such an approach  
45 provides a comprehensive framework for understanding the disruptive effects of district splitting  
46 on health system organization and service delivery.

47 **Keywords:** District Splitting, Health workforce, Chaos, Systems, Decentralisation, Uganda

48

49

50

51

52

53

54

55

56

57

58

59

60

61

62

63

64

65

66

67

68

69

70

71

72

73

## 74 **1.0 Introduction**

75 Decentralized administrative units are crucial for effective service delivery worldwide (Walker &  
76 Andrews, 2015). In Uganda, the current local government structures can be traced back to 1948,  
77 with district demarcation beginning in 1959. District splitting and subsequent, creation of new  
78 districts, is part of decentralization efforts to bring services closer to citizens (Ojambo, 2012).  
79 Between 1990 and 2019, Uganda saw a rapid increase in districts from 39 to 140 (Green, 2008;  
80 Mutebi et al., 2019). Despite its advantages in bringing services (e.g. outpatient health services,  
81 maternal and child health services, inpatient health services etc) close to people, district splitting  
82 has also negatively impacted service delivery capabilities, especially in health, by disrupting  
83 health system structures and creating new administrative burdens (Kuuml & Jane, 2014). Despite  
84 claims that splitting enhances service proximity, studies conducted elsewhere appear to suggest  
85 that it mainly serves political interests (Awortwi & Bert Helmsing, 2014). The consequences of  
86 such splits on health systems, particularly on workforce organization, remain underexplored.

87 In Uganda, health system decentralization paralleled political decentralization, devolving health  
88 system functions to local governments (Ojambo, 2012). This shift empowered district service  
89 commissions to manage human resources, including health workforce recruitment (Mangwi  
90 Ayiasi et al., 2019; Mansour et al., 2022; Uganda government, 1997). The tiered district health  
91 system, aligned with administrative structures, comprises various levels of health service  
92 provisions and mandates which corresponds to the workforce structures.

### 93 **The district health system structure and health workforce**

94 The health workforce is intricately linked to the hierarchical decentralized political system, with  
95 each administrative unit having attached to the tiered healthcare levels and staffing norms  
96 (Green, 2008; Ramadhan, 2014) See table 1. District splitting directly affects the subnational  
97 health workforce structure and functionality, yet research primarily focuses on decentralization's  
98 overall impacts (Bossert & Mitchell, 2011). This study aimed at using the chaos and systems  
99 theories to explore how the health workforce as a building block of the district health system re-  
100 organised itself following district splitting in Uganda.

### 101 **Theoretical Framework:**

102 The study utilized Chaos and Systems theories to examine the impact of district splitting on the  
103 subnational health workforce. Systems theory views organizations as interconnected  
104 subsystems, emphasizing holistic understanding (Chikere & Nwoka, 2015). Districts, comprising  
105 various subsystems including health, experience destabilization and subsequent system  
106 responses post-split.

107 Chaos theory suggests that system responses are nonlinear and unpredictable, characterized by  
108 self-organization and feedback loops (Levy, 1994; Rickles et al., 2007). This leads to disruptions  
109 and reorganization within health subsystems (Harrington & Voehl, 2016). Systems theory  
110 informed the conceptualization of health workforce organization, while chaos theory analyzed  
111 system response patterns post-split. The major components of chaos theory include;  
112 interconnectedness, feedback loops, and self-organization, evident in informal feedback  
113 processes and meetings facilitating efficient task performance and results attainment. These were  
114 applied to guide the analysis of the study.

### 115 **Study design**

116 This was a cross-sectional exploratory study that used qualitative research methods with both  
117 deductive and inductive thematic analysis.

## 118 **Study sites**

119 The study was conducted in four broader regions of Uganda i.e. Northern, Western, Eastern and  
120 Central. Within each of these regions, two districts were selected for inclusion into the study.  
121 Table two shows the eight districts selected for the study i.e. four old districts that existed before  
122 the split i.e. Lira, Pallisa, Mukono and Mbarara from which the new districts of Dokolo, Kibuku,  
123 Buikwe and Ibanda were carved out during the 2010 split. At least two districts i.e., an old and  
124 new were selected from each region hence representation from four regions of the country. The  
125 selection criteria of the four old districts were based on the Ministry of Finance and Economic  
126 Planning (MOFEP) and Development Social Economic Status (SES) (GoU, 2010; Heller et al., 2010;  
127 Kavuma Richard, 2009) where upon two districts were perceived to be performing well and the  
128 other two perceived to be performing poorly.

## 129 **Study participants**

130 The study included a purposive sample of 22 participants: four elected district political leaders,  
131 five local government staff, four district service commission members, four district health team  
132 officials, and five district senior management members. Participants were selected based on their  
133 involvement in health workforce organization before and after district splitting, ensuring they  
134 were employed in the district during and after the split. Only those in leadership roles or  
135 governing committees responsible for health workforce organization were included, with equal  
136 representation from old and new districts. They were chosen for their strategic roles in health  
137 workforce planning and management.

## 138 **Data collection methods**

### 139 **Key informant interviews**

140 Interviews were conducted in December 2018, and the information elicited covered respondent's  
141 experiences spanning fourteen years from 2005 to 2018. These were conducted with senior  
142 district officials involved in the recruitment process during district splitting. Participants were  
143 selected from various categories: District Service Commission (DSC) members (Administrative),  
144 DSC technical members (Administrative), District Health Managers (Technical), District Technical  
145 Leaders (Administrative local government), and District political leaders (Politicians). These  
146 categories were chosen for their critical roles in district planning and health workforce  
147 leadership. Participants from both old and new districts were included to enable comparison.

148 Experienced interviewers with master's degrees conducted the interviews using a specially  
149 developed guide covering the major themes from the research questions. Each interview lasted  
150 about 45 minutes and was recorded digitally. Interviews took place at respondents' preferred  
151 locations, usually their workplaces. The study also involved reviewing documents to understand  
152 local government policies and decentralization regarding DS. Key documents reviewed included  
153 the Public Service Standing Orders and the Human Resource for Health Policy in Uganda, which  
154 informed recruitment and deployment processes.

### 155 **Data analysis**

156 Interview data were transcribed verbatim from audio recordings into Microsoft office word with  
157 transcripts were coded deductively following the applied framework domains in Atlas.ti version  
158 7 where the codebook was developed and the codes reflected the chaos theories as an analytic  
159 framework, four themes were identified for deductive thematic analysis which included;;  
160 Systemic assignment of health workers based on location during DS, inter-district health worker  
161 migration (on secondment or appointment), intra-district health worker migration (within the

162 district), and health workforce shortages (due to vertical and horizontal migration). These  
163 themes were analyzed to provide interpretive explanations, comparing data between old and new  
164 districts and different healthcare system levels at the subnational level.

165 The first author and a social scientist independently reviewed and coded interviews using a  
166 deductive thematic approach based on the key themes and later inductively following emerging  
167 insights from the datasets. They discussed individual matrices, focusing on coding differences  
168 until when variations were resolved. This process enhanced the quality, depth, and interpretation  
169 of results.

## 170 **Ethical considerations**

171 The study was approved by the Institutional Review Board at Makerere University School of  
172 Public Health (HDREC 140) and the Uganda National Council of Science and Technology (SS  
173 2678). Administrative clearances were obtained from district political and health sector leaders  
174 before conducting interviews. Respondents were informed about the study's objectives,  
175 procedures, risks, and benefits. Interviewers had no prior contact with respondents. Interviews  
176 were conducted only after obtaining written informed consent and a separate consent for  
177 recording. They were conducted in quiet, secure locations chosen by respondents, interviews  
178 ensured privacy and confidentiality. All identifying information was anonymized and replaced  
179 with pseudonyms.

180

181

182

183

184

185

186

187

188

189

190

191

192

193

194

195

196

197

198

## 199 Results

200 Overall, twenty-two respondents were selected from the eight districts with an average of three  
201 per district. The selection took into consideration the five types of cadre identified for interview.

| Age group    | Frequency | %age       |
|--------------|-----------|------------|
| <45          | 4         | 18.2       |
| 45-49        | 3         | 13.6       |
| 50-54        | 2         | 9.1        |
| 55-59        | 2         | 9.1        |
| 60-64        | 3         | 13.6       |
| >64          | 8         | 36.4       |
| <b>Total</b> | <b>22</b> | <b>100</b> |

203 Out of the 22 respondents interviewed, those 64 years and above group (36.4%) had the highest  
204 number of respondents followed by those below 45 years (18.2%), 45-49 years (13.6%) and 60-  
205 64 years (13.6%) respectively. Age was generally balanced between old and new districts with  
206 almost equal numbers in each age group. There was only one female among the 22 respondents  
207 interviewed, which could be a sign that the most dominant top leadership positions are held by  
208 males. Using systems and chaos theory, the study examined the impacts of district splitting. Four  
209 themes emerged: random health worker assignment, inter-district migration, intra-district  
210 movement, and resulting shortages. Splitting the health system caused workforce reorganization,  
211 random worker allocation, and exacerbated shortages. This affected all administrative levels,  
212 disrupting operations and service delivery, and causing overall disruption, disorganization, and  
213 delayed stability in both old and new districts.

### 214 Emergence of district health workforce management structures after reorganisation

#### 215 Systemic assignment of health workers

216 District splitting occurred along geographical boundaries defined by the local government act.  
217 Before splitting, health workers were attached to particular health facilities by the district health  
218 officer and chief administrative officer. Post-splitting, health workers were systemically assigned  
219 to new districts based on their location at the time of the split. Most workers remained at their  
220 stations, with few moving to support new districts. Those who moved left gaps, prompting self-  
221 organization to fill them. Staff mostly stayed put, with only seconded workers relocating, some  
222 later choosing to move permanently.

223 *Most of our staff remained at their work stations after the districts split. It's only*  
224 *those that were seconded to support the new district that moved, though some*  
225 *later made up their mind to move on to the new district (CAO 3).*

#### 226 Inter-district migration of health workers

227 During district splitting, old districts seconded health workers to new ones as per MOLG/PSC  
228 requirements. Both old and new districts began appointing staff to fill vacancies. Seconded staff,  
229 officially sent by old districts to new ones, started work while recruitment progressed. This led  
230 to gaps in old districts, necessitating redeployment. Meanwhile, seconded staff were free to apply  
231 for relocation or higher positions. Old districts retained key personnel, often senior staff,  
232 influencing new district staffing. Tensions arose when new districts rejected non-native staff,  
233 requiring higher authority intervention. Informal negotiations and lobbying formed to resolve  
234 disputes, promoting self-organization. Over time, tensions eased through reconciliation,  
235 showcasing the interconnectedness and power of dialogue among involved parties.

236 *We in the old district had the advantage of choosing who goes to the new district*  
237 *especially when it came to setting it off, but still HWs who wanted to move due to*  
238 *varying reasons, still moved on whether we accepted or not and we could not stop*  
239 *them from moving. So those were struggles under the carpet that were agreed on*  
240 *just like that (LC V Chair 1).*

241 *Seconding health workers was not an easy task because either district wanted*  
242 *the best. I remember how the new district rejected the person we sent them and*  
243 *demanding for another person. To me a beggar has no choice. You either take*  
244 *what is available or leave (CAO 3).*

245 During the secondment process, friction arose as districts competed to attract senior or highly  
246 qualified health workers. Some districts resisted releasing staff, while new districts offered  
247 attractive terms of engagement/deployment, leading to unauthorized staff movements and chaos.  
248 Individual decisions escalated, involving district leadership and triggering the "butterfly effect".  
249 In some instances, reconciliation efforts, with support from Health Service Commission (HSC)  
250 members and local opinion leaders, restored order through reorganization and return to sanity  
251 within the districts.

252 *"You know time came when we competed for the good health workers we knew.*  
253 *We had to offer better terms than our competitors so that the health worker is*  
254 *convinced to join our district. This is allowed in this new arrangement of*  
255 *decentralisation" but in most cases there was a lot of unofficial agreements*  
256 *between the administration and staff (CAO 2)*

257 *We witnessed a lot of behind the screens moves as some health workers were*  
258 *lobbying for movement to another district, and others were negotiating for*  
259 *promotion even before being appointed. But because we are not technical, we let*  
260 *them do the negotiation and the technical personnel handled that (LC V Chair 2).*

261 The secondment and appointment process received utmost attention across districts, with  
262 District Service Commissions (DSCs) resisting any external influence. However, districts  
263 prioritized qualified natives over "external" professionals with similar qualifications, causing  
264 tension among leaders and necessitating crisis meetings. Feedback and consultations between  
265 political and technical leadership arms, along with involvement of Health Service Commission  
266 (HSC) or Public Service Commission (PSC), led to consensus on the way forward, restoring  
267 normalcy.

268 *Let me tell you, the decision to retain and refer HWs created a lot of tension with*  
269 *a lot of lobbying by both district councillors, HWs and the technocrats. At one*  
270 *point we were in a planning meeting and some members started accusing each*  
271 *other of influencing the screening to the extent of almost exchanging blows (DSC*  
272 *Chair 3).*

273 *You know these district councillors thought they could force me into appointing*  
274 *people without the right qualifications, I refused and assured them I was not*  
275 *willing to face the inspector general of government because of corrupt tendencies*  
276 *in the recruitment. I even asked them to put it in writing and I forward it to our*  
277 *seniors in the ministry. That's when they all went silent (CAO 5).*

278 In new districts, District Health Officers (DHOs) served in acting capacities after being seconded  
279 from old districts or appointed by the public service commission to initiate district health offices.

280 Many seconded health workers assumed automatic recruitment leading to preferential treatment  
281 of health workers from old district which could have led to not following recommended  
282 procedures when recruiting staff. This disorganized relations between workers and leaders,  
283 impacting inter-district cooperation. Negotiations, mostly informal, resolved disagreements, but  
284 in cases of irreconcilable differences, health workers returned to previous districts or sought  
285 employment elsewhere.

286 *“When I was seconded to the new district, I thought it was obvious they were*  
287 *going to recruit me because I had all the qualifications but surprisingly, I started*  
288 *hearing talk from some colleagues that I was not a son of the soil. Meaning that*  
289 *because I was not born in the district, the DSC had some other person they*  
290 *preferred. I was only saved by the HSC representative who insisted that the*  
291 *person they had fronted did not qualify for the post.” (DHO 2)*

292 The final task of appointing and deploying after secondment faced disruptions and interference  
293 from various leaders. District Service Commissions (DSCs) and District Health Officers (DHOs),  
294 guided by acting Chief Administrative Officers (CAOs), were responsible. Interference affected  
295 DHOs, as health workers requested deployment near their homes or towns. DHOs would  
296 occasionally hold informal meetings before releasing deployment schedules, involving district  
297 leaders and technocrats to maintain good relations. Acting positions in new districts made  
298 technical leaders vulnerable to political pressure, affecting decision-making. Appointments often  
299 occurred in the presence of a Health Service Commission (HSC) member, providing support to  
300 technical personnel.

301 *In my district we had several qualified health workers who had been in the same*  
302 *positions for several years without being promoted due to lack of opportunities.*  
303 *We therefore considered them during the recruitment process and appointed*  
304 *them on probation in new positions as a way of motivation. (CAO 3).*

305 Many seconded staff from old districts were appointed on probation in their new districts, while  
306 some acting staff not meeting requirements were advised to return to their previous districts or  
307 accept lower positions, causing distress and disorganization. Those seeking official transfers but  
308 not accepted faced dilemmas, as returning to previous districts was often not feasible, forcing  
309 them to seek employment elsewhere. There was different treatment/handling of health workers  
310 on a case by case basis which is reflective of lack or abuse of standard operating procedure for  
311 managing human resource for health.

312 *“I didn’t like the way some of the seconded staff were treated by the DSC just*  
313 *because they preferred candidates that were born in this district. We lost a*  
314 *chance of getting very experienced and qualified staff because the DSC wanted*  
315 *people born in the district “son of the soil”. (DSC Sec 2)*

### 316 **Intra district migration of health workers**

317 Following district splitting, health worker movement occurred within both old and new districts  
318 due to gaps left by those on secondment or seeking new appointments elsewhere. Both districts  
319 identified gaps, advertised vacancies, conducted interviews, and appointed new staff to fill the  
320 gaps. Meanwhile, reorganization of available workforce ensured continued service delivery  
321 despite gaps. District Health Officers (DHOs) redeployed staff to facilities with vacancies, facing  
322 challenges as some workers resisted relocation. Meetings between health workers and their  
323 leadership were held to resolve disputes, sometimes involving Chief Administrative Officers  
324 (CAOs). Redeployment occurred in all districts post-splitting to address workforce gaps. After



325 probationary appointments, district health offices reorganized staff at all levels to maintain  
326 quality healthcare services.

327 *Immediately after DS occurred, we had to do reallocation of health workers to fill*  
328 *some of the key positions that had been created due to seconded staff. Then we*  
329 *also reorganised the workforce after the final appointment of new staff (CAO 1).*

### 330 **Health workforce shortages**

331 Throughout the various forms of reorganization, the existing health workforce was distributed  
332 across districts, creating gaps in each district, doubling the pre-splitting workload. Recruitment  
333 efforts failed to fill all gaps, leading to further disruptions. Emergent gaps due to seconded or  
334 unauthorized departures required reorganization and advertising of vacancies, exacerbating  
335 understaffing and disrupting health facility operations. Districts already grappling with  
336 understaffing pre-splitting faced worsened conditions. Filling vacancies awaited confirmation  
337 from the Ministry of Finance, Planning, and Economic Development (MOFPED) on the wage bill.  
338 Constant feedback meetings among affected district leaders facilitated secondments and  
339 redeployments, achieving workforce balance across districts before addressing persisting gaps  
340 through advertisement and recruitment.

### 341 **Discussion**

342 This study aimed at using the chaos and systems theories to explore how the health workforce as  
343 a building block of the district health system re-organised itself following district splitting in  
344 Uganda. This qualitative study examines the reorganization of the health workforce following  
345 district splitting in Uganda, revealing its impact on both new and old districts. It explores how  
346 reorganization within and between districts results in multidirectional workforce arrangements,  
347 such as systematic assignment of health workers, inter-district migration of health workers, intra  
348 district migration of health workers and health workforce shortages. Subsequently, these will be  
349 elaborated on further in the sections that follow. The study offers fresh insights into the  
350 interconnectedness of the health workforce and district systems, shedding light on the  
351 complexities of their reorganization after district splitting.

352 The study also critiques broad discussions on decentralization, urging for a deeper understanding  
353 of local government systems and their subsystems(Zaidi et al., 2019) to inform health worker  
354 allocation following district splitting. It stresses the importance of policymakers comprehension  
355 of these subsystems' interactions and formations to address the positive and negative impacts of  
356 district splitting effectively(Abimbola et al., 2019). Despite challenges like respondent recall, the  
357 study utilizes triangulation of data sources to mitigate these issues, enhancing the reliability of its  
358 findings(Beesley et al., 2011; Durham et al., 2015). Detailed discussions about the results  
359 following themes from the applied framework follows here next;

### 360 **Systematic assignment of health workforce**

361 Before district splitting, the decentralisation policy through the local government act gave  
362 districts autonomous powers to advertise, interview and recruit health workers. These health  
363 workers were already stationed across health facilities in all the selected districts. However, after  
364 the splitting, most health workers remained at their original workstations based the district  
365 appointment and deployment plans under their local government demarcations. Many avoided  
366 moving due to observed disruptions and chaotic scenarios. Some were content with their current  
367 stations, while others were reluctant to undergo the rigorous process of switching districts, which  
368 involved either secondment by the Chief Administrative Officer (CAO) or applying through the

369 standard District Service Commission procedures. Another study conducted in Kampala city  
370 showed that those who have lived in rural areas were less likely to report wanting to  
371 emigrate(Nguyen et al., 2008).

### 372 **Inter-district migration of health workers**

373 After district splitting, some health workers were seconded to new districts by Chief  
374 Administrative Officers (CAOs) to kickstart operations, causing disruptions in the old districts.  
375 This led to gaps due to staff departures on secondment or appointment. New positions were  
376 created at different levels in the health system structures of both new and old districts. However,  
377 the movement of health workers between districts was not smooth, disrupting both subsystems  
378 and the entire district structure. Disagreements arose on how to share available human  
379 resources, affecting recruitment components interconnected within the system. In other studies  
380 it was noted that these disruptions triggered emergent behaviours and took time to reorganize,  
381 mainly due to political and technical differences between districts(Chen et al., 2021; Nalukwago  
382 et al., 2019).

383 In this study, negotiations and rule bending occurred during secondments and appointments,  
384 breaking some rules in order to facilitate recruitment. In a similar study the tension between rule  
385 makers and breakers influenced the ecology of the field(Dzansi et al., 2016). Similar findings from  
386 another study showed that negotiations, bargaining, and conflicts between district leaders,  
387 technocrats, and health workers ensued, leading to disorganization within and between  
388 districts(Parrish, 2022). However, through feedback negotiations, the chaos was eventually  
389 normalized into a reorganized state(Renn, 2022; Schein, 2004).

390 In this study, a lot of negotiations during this period of splitting brought out the  
391 interconnectedness of different players and self-organization which made it possible for  
392 agreements to be reached. This chaotic period highlights the dynamics between rule breakers and  
393 makers, shaping both tight and loose cultures within organizations(Lithwick, 2012). While chaos  
394 presents challenges, it also leads to innovative solutions(Gelfand, 2019; Parrish, 2022). Studies in  
395 Kenya have shown recruitment strategies focusing on geographic areas to minimize staff  
396 transfers(Adano, 2008).

### 397 **Intra-district migration of health workers**

398 The recruitment process faced internal and external disruptions, delaying the process in most  
399 districts. Suspected ulterior motives among committee members led to delays, requiring  
400 extensive discussions and informal meetings for resolution. Respondents considered these to be  
401 a result of political interference by different players which later resulted into several informal  
402 meetings and consensus was reached by all concerned parties. Therefore, the formal process was  
403 compromised, prompting management to adopt informal transparency measures, settling  
404 disputes and allowing work to proceed. In another study it was seen that the decision-making in  
405 behaviour change is often quantum rather than linear, with changes being conceptualized as  
406 deterministic processes(Kenneth Resnicow, 2008). It was also observed that small issues during  
407 redeployment caused friction among leaders but were resolved through formal and informal  
408 discussions, reaching consensus. Some behaviour change events may be linear, while others may  
409 be complex and nonlinear, requiring a chaos lens for understanding(Ken Resnicow & Vaughan,  
410 2011; Kenneth Resnicow, 2008).

### 411 **Health workforce shortages**

412 After the completion of secondment, appointment, and redeployment across all districts, new  
413 gaps emerged due to unauthorized departures, requiring reorganization and advertising of

414 vacant posts. These unforeseen movements disrupted work at health facilities, worsening  
415 understaffing and posing challenges in transferring recently deployed workers. Time constraints  
416 and financial implications compounded the urgency to fill vacancies before the end of the financial  
417 year. The complex and chaotic nature of health worker behaviour change can be integrated into  
418 public health interventions, offering insights into how individuals and organizations  
419 adapt(Gardner et al., 2021). Despite completing the recruitment process, new gaps arose from  
420 unauthorized departures, further disrupting the system. A complementary approach is  
421 suggested, encouraging the incorporation of nonlinear concepts into intervention design and  
422 analysis(Bien, 2004; C’De Baca & Wilbourne, 2004; Miller, William R C’de Baca, 2001; Miller,  
423 2004). The solutions of yesterday had now become the problems of today (Agyepong et al., 2012).  
424 Support from Chief Administrative Officers (CAOs) is crucial for District Health Officers (DHOs)  
425 during deployment to mitigate complaints and discontent among health workers.

426 The study underscores the implications for reconceptualizing workforce management in  
427 decentralized settings post-district splitting to enhance service delivery efficiency at sub-national  
428 levels, especially in human resource for health organization. It challenges the instrumentalist  
429 view of district creation as merely bringing services closer to the population, revealing  
430 unintended chaos in health workforce distribution. By employing a chaos lens, the study  
431 highlights non-linear disruptions and disorganization within the health workforce subsystems,  
432 emphasizing the need for a more systematic approach to decentralization and district splitting to  
433 achieve efficiency goals(Zanin & Martínez, 2022).

434

#### 435 **Strengths and limitations of the study**

436 This paper is informed by district leaders and health workers perspectives of what happened  
437 with the reorganisation processes after districts were split. Their views inform our conclusions  
438 about the effect of district splitting human resources for health management focusing on the  
439 reorganisation processes. All findings are from people who were present and directly  
440 participated in these processes, the study brings first-hand experiences of what transpired, while  
441 the systems and chaos theories show us the unforeseen inefficiencies that occurred in the  
442 reorganisation process after splits had occurred. Its conclusions can reliably be assumed in  
443 respect of other districts that have experienced district splitting. There could have been some  
444 social-desirable bias given the area under study. It’s possible that there was some recall bias given  
445 that the study was conducted some years after district splitting of 2010. It’s also possible that  
446 there was social desirability and not wanting to talk about bad things about the district and its  
447 human resource by some respondents. Due to the cross-sectional nature of the research, it was  
448 unable to observe and provide for analysis of trends over time. Findings from the few study  
449 districts are hard to generalise as experiences may have varied in other districts hence impeding  
450 generalisability.

#### 451 **Conclusions**

452 District splitting affected all district systems right through the physical divide along geographical  
453 boundaries, through the whole district administrative structure, splitting the district councils,  
454 district local government (all departments including health), DSCs etc. The health system was  
455 generally affected as it aligns with the district local government structure from top to bottom, and  
456 is categorised into four sub systems. These subsystems are interconnected, interrelated, and  
457 interdependent, working together to produce optimal outcomes while collectively striving to  
458 reorganize the health workforce to deliver quality healthcare.

459 We see how the formal system with linear thinking is disrupted and disorganised by political and  
460 technical interference before it can reorganise itself back to normal. Even when the districts think  
461 they are done with the reorganisation, and gaps have been filled, then they realise that some  
462 health workers left their stations without official release. Then the process of reorganisation  
463 continues on, meaning that the solutions of yesterday become the problems of today.

464 Findings suggest that without considering the consequences of underlying patterns,  
465 interconnected actions, continuous feedback loops, and self-organizing mechanisms after  
466 splitting, systems and subsystems do not perform as expected. Unexpected small errors can arise,  
467 leading to a significant negative impact on the health workforce reorganization process.

468 The chaotic nature involves disorder, disruption and disorganisation of systems including the  
469 health workforce. But then the process of reorganisation that follows chaotic happens, introduces  
470 enabling conditions that include innovation, creativity and flexibility. These introduce an  
471 environment of understanding among the different district leaders and health workers. If these  
472 are considered during the planning and implementation of district splitting processes, they are  
473 likely to benefit both parties and reduce the tension or chaos that is caused by the splitting.

474

## 475 **Declarations**

### 476 **Ethical approval and consent to participate**

477 This study has received ethical approval from Makerere University School of Public Health Higher  
478 Degrees Research and Ethics Committee (HDREC) ref; HDREC 140. The final ethical clearance is  
479 being processed from the Ugandan National Council for Sciences and Technology (UNCST) ref; SS  
480 2678. Further administrative clearance was obtained from the management of all participating  
481 health facilities and organisations where the study was conducted. Individual informed consent  
482 was obtained from all prospective respondents.

### 483 **Consent for publication**

484 Consent to publish the findings of the study was obtained at the point of seeking consent to  
485 participate. The participants' confidentiality and anonymity while reporting was assured.

### 486 **Not applicable**

### 487 **Availability of data and materials**

488 The datasets used and/or analysed during the current study are available from the corresponding  
489 author upon reasonable request.

### 490 **Competing interests**

491 The authors declare that they have no competing interests.

### 492 **Funding**

493 The study received no specific funding but support for field work facilitation was obtained from  
494 the Department of Health Policy Planning and Management, School of Public Health, College of  
495 Health Sciences, Makerere University Kampala, Uganda.

496

497

498 **Author's contribution**

499 AM conceived the study; ER and FM provided supervision support. MM guided the methods with  
500 special attention to the theories and SK helped with conceptualisation of health systems. All  
501 authors reviewed and approved the final manuscript.

502 **Acknowledgements**

503 The author wishes to acknowledge the contribution of the data collection team and the reviewers  
504 who provided useful insights that informed the revision of the manuscript.

505 **Author's information**

506 **Affiliations**

507 Department of Health Policy Planning and Management, School of Public Health, College of Health  
508 Sciences, Makerere University Kampala, Uganda.

509 Aloysius Mutebi, Elizeus Rutebemberwa

510 Department of Epidemiology and Biostatistics, School of Public Health, College of Health Sciences,  
511 Makerere University Kampala, Uganda.

512 Fredrick Makumbi

513 Nottingham Trent University

514 Moses Mukuru

515 Corresponding author

516 Correspondences to Aloysius Mutebi

517 ORCID (0000-0002-6837-5488)

518

519

520 **References**

521 Abimbola, S., Baatiema, L., & Bigdeli, M. (2019). The impacts of decentralization on health  
522 system equity, efficiency and resilience: A realist synthesis of the evidence. *Health Policy*  
523 *and Planning*, 34(8), 605–617. <https://doi.org/10.1093/heapol/czz055>

524 Adano, U. (2008). The health worker recruitment and deployment process in Kenya: An  
525 emergency hiring program. *Human Resources for Health*. [https://doi.org/10.1186/1478-](https://doi.org/10.1186/1478-4491-6-19)  
526 [4491-6-19](https://doi.org/10.1186/1478-4491-6-19)

527 Beesley, M., Cometto, G., & Pavignani, E. (2011). From drought to deluge: How information  
528 overload saturated absorption capacity in a disrupted health sector. *Health Policy and*  
529 *Planning*, 26(6), 445–452. <https://doi.org/10.1093/heapol/czq083>

530 Bien, T. H. (2004). Quantum Change and Psychotherapy. *Journal of Clinical Psychology*, 60(5),  
531 493–501. <https://doi.org/10.1002/jclp.20003>

532 C'De Baca, J., & Wilbourne, P. (2004). Quantum Change: Ten Years Later. *Journal of Clinical*  
533 *Psychology*, 60(5), 531–541. <https://doi.org/10.1002/jclp.20006>

534 Chen, J., Ssenyonjo, A., Wabwire-Mangen, F., Kim, J. H., Bell, G., & Hirschhorn, L. (2021). Does  
535 decentralization of health systems translate into decentralization of authority? A decision

- 536 space analysis of Ugandan healthcare facilities. *Health Policy and Planning*, 36(9), 1408–  
537 1417. <https://doi.org/10.1093/heapol/czab074>
- 538 Durham, J., Pavignani, E., Beesley, M., & Hill, P. S. (2015). Human resources for health in six  
539 healthcare arenas under stress: A qualitative study. *Human Resources for Health*, 13(1), 1–  
540 12. <https://doi.org/10.1186/s12960-015-0005-7>
- 541 Dzansi, L. W., Chipunza, C., & Monnapula-Mapesela, M. (2016). Municipal Employees’  
542 Perceptions Of Political Interference In Human Resource Management Practices: Evidence  
543 From The Free State Province In South Africa. *International Business & Economics Research  
544 Journal (IBER)*, 15(1), 15. <https://doi.org/10.19030/iber.v15i1.9572>
- 545 Gardner, B., Arden, M. A., Brown, D., Eves, F. F., Green, J., Hamilton, K., Hankonen, N., Inauen, J.,  
546 Keller, J., Kwasnicka, D., Labudek, S., Marien, H., Masaryk, R., McCleary, N., Mullan, B. A.,  
547 Neter, E., Orbell, S., Potthoff, S., & Lally, P. (2021). Developing habit-based health behaviour  
548 change interventions: twenty-one questions to guide future research. *Psychology and  
549 Health*, 0(0), 1–23. <https://doi.org/10.1080/08870446.2021.2003362>
- 550 Gelfand, M. (2019). *Rule Makers, Rule Breakers: Tight and Loose Cultures and the Secret Signals*.  
551 Scribner.  
552 [https://books.google.co.uk/books?hl=en&lr=&id=bLSkDwAAQBAJ&oi=fnd&pg=PA1&dq=Michele+Gelfand+\(2019\)+&ots=PBE3A28KtB&sig=awjkodUE51BJvRZ9K51nD7bLFt4&redir\\_esc=y#v=onepage&q=Michele Gelfand \(2019\)&f=false](https://books.google.co.uk/books?hl=en&lr=&id=bLSkDwAAQBAJ&oi=fnd&pg=PA1&dq=Michele+Gelfand+(2019)+&ots=PBE3A28KtB&sig=awjkodUE51BJvRZ9K51nD7bLFt4&redir_esc=y#v=onepage&q=Michele+Gelfand+(2019)&f=false)
- 555 GoU. (2010). National Development Plan (2010/11-2014/15). In *Republic of Uganda*.
- 556 Heller, P. S., Powell-Jackson, T., Hanson, K., McIntyre, D., Okwero Peter, Tandon, A., Sparkes, S.,  
557 Mclaughlin, J., Hoogeveen, J. G., Cashin, C., Mossialos, E., & Zhang, L. (2010). Fiscal Space for  
558 Health in Uganda. *HNP Discussion Paper*, 25(47061), 1–94, World Bank Working Paper no.  
559 186. <https://doi.org/10.1596/9780782138290-5>
- 560 Kavuma Richard. (2009). *Explainer: Local government structures in Uganda | Katine | The  
561 Guardian*. [https://www.theguardian.com/katine/2009/dec/14/local-government-  
562 explainer](https://www.theguardian.com/katine/2009/dec/14/local-government-explainer)
- 563 Lithwick, D. (2012). The Best American Magazine Writing 2017. *The American Society of  
564 Magazine Editors · 2017*, 527.  
565 [https://www.google.co.uk/books/edition/The\\_Best\\_American\\_Magazine\\_Writing\\_2017/CI  
566 I4DwAAQBAJ?hl=en&gbpv=1&dq=Lithwick+\(2012\)&pg=PA527&printsec=frontcover](https://www.google.co.uk/books/edition/The_Best_American_Magazine_Writing_2017/CI4DwAAQBAJ?hl=en&gbpv=1&dq=Lithwick+(2012)&pg=PA527&printsec=frontcover)
- 567 Mangwi Ayiasi, R., Rutebemberwa, E., & Martineau, T. (2019). “posting policies don’t change  
568 because there is peace or war”: The staff deployment challenges for two large health  
569 employers during and after conflict in Northern Uganda. *Human Resources for Health*,  
570 17(1), 1–10. <https://doi.org/10.1186/s12960-019-0361-9>
- 571 Mansour, W., Aryaija-Karemani, A., Martineau, T., Namakula, J., Mubiri, P., Ssenogooba, F., &  
572 Raven, J. (2022). Management of human resources for health in health districts in Uganda:  
573 A decision space analysis. *International Journal of Health Planning and Management*, 37(2),  
574 770–789. <https://doi.org/10.1002/hpm.3359>
- 575 Miller, William R C’de Baca, J. (2001). Quantum change: When epiphanies and sudden insights  
576 transform ordinary lives. *American Psychological Association*.  
577 <https://psycnet.apa.org/record/2001-18640-000>
- 578 Miller, W. R. (2004). The Phenomenon of Quantum Change. *Journal of Clinical Psychology*, 60(5),  
579 453–460. <https://doi.org/10.1002/jclp.20000>
- 580 Nalukwago, J., Crutzen, R., van den Borne, B., Bukuluki, P. M., Bufumbo, L., Burke, H. M. C., Field,  
581 S., Zikusooka, A., Fiedler, A. A., & Alaii, J. (2019). Gender norms associated with adolescent

- 582 sexual behaviours in Uganda. *International Social Science Journal*, 69(231), 35–48.  
583 <https://doi.org/10.1111/issj.12203>
- 584 Nguyen, L., Ropers, S., Nderitu, E., Zuyderduin, A., Luboga, S., & Hagopian, A. (2008). Intent to  
585 migrate among nursing students in Uganda: Measures of the brain drain in the next  
586 generation of health professionals. *Human Resources for Health*, 6, 1–11.  
587 <https://doi.org/10.1186/1478-4491-6-5>
- 588 Parrish, B. S. (2022). *Dahlia Lithwick Things You Never Know About Her, Her Articles And Her*  
589 *New Book*. Amazon Digital Services LLC - Kdp.
- 590 Renn, K. A. (2022). *Reimagining the Study of Higher Education: Generous Thinking, Chaos, and*  
591 *Order in a Low Consensus Field*. Published by Johns Hopkins University Press.  
592 <https://www.ashe.ws/files/Past Presidents/Renn.pdf>
- 593 Resnicow, Ken, & Vaughan, R. (2011). A chaotic view of behavior change: A quantum leap for  
594 health promotion. *Models and Applications of Chaos Theory in Modern Sciences*, 7, 3–13.  
595 <https://doi.org/10.1186/1479-Received>
- 596 Resnicow, Kenneth. (2008). Embracing Chaos and Complexity: A Quantum Change for Public  
597 Health. *Am J Public Health*, 1382–1389. <https://doi.org/10.2105/AJPH.2007.129460>
- 598 Schein, E. H. (2004). *Jossey-Bass*. A Wiley Imprint. [http://www.untag-](http://www.untag-smd.ac.id/files/Perpustakaan_Digital_2/ORGANIZATIONAL CULTURE Organizational)  
599 [smd.ac.id/files/Perpustakaan\\_Digital\\_2/ORGANIZATIONAL CULTURE Organizational](http://www.untag-smd.ac.id/files/Perpustakaan_Digital_2/ORGANIZATIONAL CULTURE Organizational)  
600 [Culture and Leadership, 3rd Edition.pdf](http://www.untag-smd.ac.id/files/Perpustakaan_Digital_2/ORGANIZATIONAL CULTURE Organizational)
- 601 Uganda government. (1997). *Local Governments Act 1997 | Uganda Legal Information Institute*.  
602 <https://ulii.org/ug/legislation/consolidated-act/243>
- 603 Zaidi, S. A., Bigdeli, M., Langlois, E. V., Riaz, A., Orr, D. W., Idrees, N., & Bump, J. B. (2019). Health  
604 systems changes after decentralisation: Progress, challenges and dynamics in Pakistan.  
605 *BMJ Global Health*. <https://doi.org/10.1136/bmjgh-2018-001013>
- 606 Zanin, M., & Martínez, J. H. (2022). Analyzing international events through the lens of statistical  
607 physics: The case of Ukraine. *Chaos*, 32(5). <https://doi.org/10.1063/5.0091628>
- 608
